# Supplementary material for: The Multi-Scale Spatial Heterogeneity of Ecosystem Services’ Supply–Demand Matching and Its Influencing Factors on Urban Green Space in China
Source: MDPI journal article supplement (doi:10.3390/f14102091), 2023-10-18
Supplement: s1 [file s1]

# Supplementary Materials

**Table S1.** Correlation coefficient between influencing factors and urban green space types, ecosystem services at the municipal scale0. \*,  $p < 0.05$ ; \*\*,  $p < 0.010$ .

|                                | COVID-19  | Accessibility | Reachability | Income    | Season    | Weather | Age       | Physical Condition | Sufficient Time | Staying with Your Child |
|--------------------------------|-----------|---------------|--------------|-----------|-----------|---------|-----------|--------------------|-----------------|-------------------------|
| Park green space               | -0.012    | -0.045        | -0.153 *     | -0.146 *  | -0.104    | -0.029  | -0.172 ** | -0.068             | -0.040          | -0.076                  |
| Plaza green space              | -0.006    | 0.022         | -0.042       | 0.021     | -0.083    | -0.036  | -0.024    | 0.067              | 0.092           | 0.110                   |
| Attached green space           | 0.031     | -0.016        | -0.039       | -0.148 *  | -0.111    | 0.063   | -0.319 ** | -0.121 *           | 0.073           | -0.125 *                |
| Attached green space           | -0.164 ** | -0.071        | -0.156 **    | 0.071     | -0.011    | -0.079  | 0.190 **  | 0.085              | 0.027           | 0.137 *                 |
| Climate regulation             | -0.145 *  | -0.042        | -0.069       | 0.023     | -0.003    | -0.045  | 0.151 *   | 0.123 *            | 0.014           | 0.041                   |
| Noise pollution reduction      | -0.100    | 0.012         | -0.023       | -0.011    | -0.041    | -0.053  | 0.129 *   | 0.081              | 0.024           | 0.029                   |
| Biodiversity conservation      | -0.124 *  | 0.005         | -0.032       | -0.017    | -0.037    | -0.044  | 0.097     | 0.093              | 0.054           | 0.016                   |
| Obtaining flora and fauna      | -0.126 *  | -0.078        | -0.066       | -0.260 ** | -0.198 ** | 0.069   | -0.293 ** | -0.151 *           | 0.084           | -0.207 **               |
| Beautifying the city           | -0.129 *  | -0.006        | -0.031       | -0.004    | 0.002     | -0.068  | 0.175 **  | 0.082              | -0.014          | 0.009                   |
| Natural disaster mitigation    | -0.078    | 0.023         | 0.002        | 0.003     | -0.049    | -0.026  | 0.124 *   | 0.054              | 0.072           | 0.027                   |
| Outdoor recreation             | -0.078    | 0.059         | -0.003       | 0.038     | -0.002    | -0.068  | 0.199 **  | 0.085              | -0.052          | 0.047                   |
| Exercise                       | -0.131 *  | 0.060         | -0.006       | -0.016    | -0.024    | -0.028  | 0.142 *   | 0.079              | -0.008          | 0.020                   |
| Physical and mental relaxation | -0.103    | 0.055         | -0.022       | 0.013     | 0.019     | -0.056  | 0.181 **  | 0.067              | -0.048          | 0.015                   |
| Spending time with family      | -0.072    | 0.073         | -0.001       | 0.012     | -0.030    | -0.059  | 0.181 **  | 0.069              | 0.020           | 0.054                   |
| Walking the dog                | -0.132 *  | -0.036        | -0.084       | -0.161 ** | -0.114    | -0.004  | -0.116    | -0.102             | 0.010           | -0.072                  |
| Social gathering               | -0.088    | 0.012         | -0.059       | -0.063    | -0.063    | -0.016  | 0.051     | -0.002             | 0.017           | -0.022                  |
| Natural education              | -0.128 *  | 0.032         | -0.071       | -0.031    | -0.071    | -0.085  | 0.061     | 0.003              | 0.015           | 0.010                   |
| Aesthetic appreciation         | -0.095    | 0.056         | -0.025       | -0.038    | -0.047    | -0.039  | 0.098     | 0.027              | 0.029           | -0.015                  |

**Table S2.** Correlation coefficient between influencing factors and urban green space types, ecosystem services at the provincial scale0. \*,  $p < 0.05$ ; \*\*,  $p < 0.010$ .

|                                | COVID-19 | Accessibility | Reachability | Income    | Season   | Weather   | Age       | Physical Condition | Sufficient Time | Staying with Your Child |
|--------------------------------|----------|---------------|--------------|-----------|----------|-----------|-----------|--------------------|-----------------|-------------------------|
| Park green space               | -0.030   | 0.077         | -0.171       | 0.020     | 0.173    | -0.076    | 0.378 *   | 0.226              | -0.052          | 0.357 *                 |
| Plaza green space              | -0.152   | -0.057        | -0.315       | -0.106    | 0.115    | -0.302    | 0.369 *   | 0.146              | -0.225          | 0.312                   |
| Attached green space           | -0.231   | -0.298        | 0.126        | -0.491 ** | -0.377 * | 0.161     | -0.394 *  | -0.234             | 0.126           | -0.224                  |
| Attached green space           | -0.205   | -0.045        | -0.305       | 0.290     | 0.168    | -0.492 ** | 0.589 **  | 0.253              | -0.467 **       | 0.427 *                 |
| Climate regulation             | 0.663 ** | 0.231         | 0.421 *      | -0.376 *  | -0.059   | 0.535 **  | -0.496 ** | -0.018             | 0.538 **        | -0.325                  |
| Noise pollution reduction      | 0.550 ** | 0.105         | 0.365 *      | -0.306    | -0.095   | 0.527 **  | -0.597 ** | -0.204             | 0.535 **        | -0.373 *                |
| Biodiversity conservation      | 0.683 ** | 0.234         | 0.356 *      | -0.272    | 0.025    | 0.477 **  | -0.447 *  | -0.051             | 0.434 *         | -0.369 *                |
| Obtaining flora and fauna      | 0.169    | 0.260         | -0.354       | 0.427 *   | 0.468 ** | -0.351    | 0.644 **  | 0.472 **           | -0.396 *        | 0.497 **                |
| Beautifying the city           | 0.584 ** | 0.143         | 0.360 *      | -0.340    | -0.134   | 0.529 **  | -0.596 ** | -0.179             | 0.490 **        | -0.410 *                |
| Natural disaster mitigation    | 0.725 ** | 0.224         | 0.278        | -0.160    | 0.071    | 0.366 *   | -0.329    | -0.029             | 0.357 *         | -0.261                  |
| Outdoor recreation             | 0.570 ** | 0.200         | 0.450 *      | -0.347    | -0.073   | 0.598 **  | -0.539 ** | -0.095             | 0.620 **        | -0.333                  |
| Exercise                       | 0.613 ** | 0.123         | 0.393 *      | -0.385 *  | -0.163   | 0.458 **  | -0.592 ** | -0.156             | 0.471 **        | -0.435 *                |
| Physical and mental relaxation | 0.537 ** | 0.151         | 0.480 **     | -0.435 *  | -0.230   | 0.538 **  | -0.642 ** | -0.180             | 0.543 **        | -0.395 *                |
| Spending time with family      | 0.587 ** | 0.189         | 0.471 **     | -0.346    | -0.080   | 0.551 **  | -0.582 ** | -0.125             | 0.515 **        | -0.412 *                |
| Walking the dog                | 0.614 ** | 0.344         | 0.181        | 0.246     | 0.360 *  | 0.212     | 0.225     | 0.322              | 0.346           | 0.062                   |
| Social gathering               | 0.602 ** | 0.235         | 0.271        | -0.010    | 0.115    | 0.344     | -0.309    | -0.022             | 0.286           | -0.267                  |
| Natural education              | 0.690 ** | 0.216         | 0.371 *      | -0.279    | -0.018   | 0.432 *   | -0.419 *  | 0.004              | 0.434 *         | -0.294                  |
| Aesthetic appreciation         | 0.578 ** | 0.215         | 0.519 **     | -0.341    | -0.096   | 0.574 **  | -0.600 ** | -0.104             | 0.521 **        | -0.426 *                |

**Table S3.** Correlation coefficient between influencing factors and urban green space types, ecosystem services at the national scale0. \*,  $p < 0.05$ ; \*\*,  $p < 0.010$ .

|                                | COVID-19  | Accessibil-<br>ity | Reachability | Income    | Season   | Weather   | Age       | Physical<br>Condition | Sufficient<br>Time | Staying with<br>Your Child |
|--------------------------------|-----------|--------------------|--------------|-----------|----------|-----------|-----------|-----------------------|--------------------|----------------------------|
| Park green space               | -0.036 *  | -0.028             | -0.035       | -0.022    | 0.008    | -0.007    | 0.010     | -0.021                | -0.027             | 0.038 *                    |
| Plaza green space              | -0.049 ** | -0.016             | -0.038 *     | 0.028     | 0.020    | -0.030    | 0.046 *   | -0.004                | -0.031             | 0.061 **                   |
| Attached green space           | 0.021     | -0.008             | -0.006       | -0.085 ** | 0.020    | 0.068 **  | -0.082 ** | -0.018                | 0.039 *            | -0.013                     |
| Attached green space           | -0.086 ** | -0.032             | -0.099 **    | 0.077 **  | 0.027    | -0.082 ** | 0.134 **  | 0.023                 | -0.083 **          | 0.110 **                   |
| Climate regulation             | 0.320 **  | 0.242 **           | 0.322 **     | 0.157 **  | 0.258 ** | 0.344 **  | 0.095 **  | 0.205 **              | 0.329 **           | 0.133 **                   |
| Noise pollution reduction      | 0.316 **  | 0.231 **           | 0.287 **     | 0.167 **  | 0.237 ** | 0.312 **  | 0.077 **  | 0.180 **              | 0.302 **           | 0.125 **                   |
| Biodiversity conservation      | 0.311 **  | 0.232 **           | 0.294 **     | 0.167 **  | 0.257 ** | 0.334 **  | 0.098 **  | 0.188 **              | 0.299 **           | 0.141 **                   |
| Obtaining flora and fauna      | 0.161 **  | 0.216 **           | 0.173 **     | 0.290 **  | 0.256 ** | 0.153 **  | 0.331 **  | 0.261 **              | 0.138 **           | 0.279 **                   |
| Beautifying the city           | 0.323 **  | 0.237 **           | 0.298 **     | 0.132 **  | 0.249 ** | 0.349 **  | 0.074 **  | 0.188 **              | 0.327 **           | 0.125 **                   |
| Natural disaster mitigation    | 0.292 **  | 0.185 **           | 0.252 **     | 0.178 **  | 0.234 ** | 0.267 **  | 0.104 **  | 0.174 **              | 0.253 **           | 0.130 **                   |
| Outdoor recreation             | 0.314 **  | 0.228 **           | 0.300 **     | 0.127 **  | 0.256 ** | 0.346 **  | 0.059 **  | 0.182 **              | 0.329 **           | 0.127 **                   |
| Exercise                       | 0.298 **  | 0.228 **           | 0.289 **     | 0.126 **  | 0.242 ** | 0.342 **  | 0.078 **  | 0.178 **              | 0.314 **           | 0.134 **                   |
| Physical and mental relaxation | 0.303 **  | 0.216 **           | 0.299 **     | 0.105 **  | 0.226 ** | 0.330 **  | 0.028     | 0.160 **              | 0.335 **           | 0.109 **                   |
| Spending time with family      | 0.308 **  | 0.229 **           | 0.302 **     | 0.150 **  | 0.258 ** | 0.345 **  | 0.074 **  | 0.180 **              | 0.303 **           | 0.158 **                   |
| Walking the dog                | 0.243 **  | 0.248 **           | 0.283 **     | 0.234 **  | 0.275 ** | 0.271 **  | 0.227 **  | 0.264 **              | 0.269 **           | 0.187 **                   |
| Social gathering               | 0.286 **  | 0.260 **           | 0.276 **     | 0.213 **  | 0.278 ** | 0.298 **  | 0.179 **  | 0.238 **              | 0.286 **           | 0.188 **                   |
| Natural education              | 0.324 **  | 0.248 **           | 0.304 **     | 0.186 **  | 0.279 ** | 0.346 **  | 0.140 **  | 0.223 **              | 0.317 **           | 0.188 **                   |
| Aesthetic appreciation         | 0.301 **  | 0.233 **           | 0.289 **     | 0.169 **  | 0.258 ** | 0.331 **  | 0.100 **  | 0.206 **              | 0.323 **           | 0.152 **                   |
